# Supplementary material for: Genomes and secondary metabolomes of Streptomyces spp. isolated from Leontopodium nivale ssp. alpinum
Source: Front Microbiol. 2024 Jun 14;15:1408479. doi: 10.3389/fmicb.2024.1408479 (PMC11212599; doi:10.3389/fmicb.2024.1408479)
Supplement: Supplementary file 1 [file Table_1.XLSX]

## Sheet: Tabelle1
GGDC results (https://ggdc.dsmz.de/ggdc.php#)
original output:
,,Formula 1,,,,Formula 2,,,,Formula 3,,,,G+C difference
Query genome,Reference genome,DDH,Model C.I.,Distance,Prob. DDH >= 70%,DDH,Model C.I.,Distance,Prob. DDH >= 70%,DDH,Model C.I.,Distance,Prob. DDH >= 70%,
LN245,GCF_002911015.1,54.50,[51 - 58%],0.2748,23.53,43.90,[41.4 - 46.5%],0.0873,6.63,52.60,[49.5 - 55.7%],0.3381,5.39,0.92
,,Formula 1,,,,Formula 2,,,,Formula 3,,,,G+C difference
Query genome,Reference genome,DDH,Model C.I.,Distance,Prob. DDH >= 70%,DDH,Model C.I.,Distance,Prob. DDH >= 70%,DDH,Model C.I.,Distance,Prob. DDH >= 70%,
LN325,GCF_009498275.1,60.00,[56.4 - 63.6%],0.2397,42.14,49.40,[46.8 - 52%],0.0731,17.47,58.80,[55.6 - 61.9%],0.2953,20.35,0.34
,,Formula 1,,,,Formula 2,,,,Formula 3,,,,G+C difference
Query genome,Reference genome,DDH,Model C.I.,Distance,Prob. DDH >= 70%,DDH,Model C.I.,Distance,Prob. DDH >= 70%,DDH,Model C.I.,Distance,Prob. DDH >= 70%,
LN499,GCF_003330865.1,33.80,[30.4 - 37.3%],0.4619,0.31,32.80,[30.3 - 35.3%],0.1281,0.31,32.40,[29.5 - 35.5%],0.5308,0.01,0.09
,,Formula 1,,,,Formula 2,,,,Formula 3,,,,G+C difference
Query genome,Reference genome,DDH,Model C.I.,Distance,Prob. DDH >= 70%,DDH,Model C.I.,Distance,Prob. DDH >= 70%,DDH,Model C.I.,Distance,Prob. DDH >= 70%,
LN500,GCF_003330865.1,33.90,[30.6 - 37.5%],0.4598,0.33,32.80,[30.4 - 35.3%],0.1278,0.32,32.60,[29.6 - 35.7%],0.5288,0.01,0.04
,,Formula 1,,,,Formula 2,,,,Formula 3,,,,G+C difference
Query genome,Reference genome,DDH,Model C.I.,Distance,Prob. DDH >= 70%,DDH,Model C.I.,Distance,Prob. DDH >= 70%,DDH,Model C.I.,Distance,Prob. DDH >= 70%,
LN549,GCF_019399205.1,54.60,[51.1 - 58.1%],0.2743,23.75,44.70,[42.1 - 47.2%],0.0852,7.71,52.80,[49.7 - 55.9%],0.3362,5.76,0.41
,,Formula 1,,,,Formula 2,,,,Formula 3,,,,G+C difference
Query genome,Reference genome,DDH,Model C.I.,Distance,Prob. DDH >= 70%,DDH,Model C.I.,Distance,Prob. DDH >= 70%,DDH,Model C.I.,Distance,Prob. DDH >= 70%,
LN590,GCF_003330865.1,21.30,[18.1 - 25%],0.6774,0,32.70,[30.3 - 35.2%],0.1283,0.3,21.50,[18.7 - 24.5%],0.7188,0,0.15
,,Formula 1,,,,Formula 2,,,,Formula 3,,,,G+C difference
Query genome,Reference genome,DDH,Model C.I.,Distance,Prob. DDH >= 70%,DDH,Model C.I.,Distance,Prob. DDH >= 70%,DDH,Model C.I.,Distance,Prob. DDH >= 70%,
LN699,GCF_008704935.1,39.30,[35.9 - 42.8%],0.3996,1.42,29.10,[26.7 - 31.6%],0.1475,0.07,35.90,[33 - 39%],0.4881,0.03,0.53
,,Formula 1,,,,Formula 2,,,,Formula 3,,,,G+C difference
Query genome,Reference genome,DDH,Model C.I.,Distance,Prob. DDH >= 70%,DDH,Model C.I.,Distance,Prob. DDH >= 70%,DDH,Model C.I.,Distance,Prob. DDH >= 70%,
LN704,GCF_009498275.1,58.40,[54.8 - 61.9%],0.2498,36.26,50.20,[47.5 - 52.8%],0.0713,19.52,57.60,[54.4 - 60.7%],0.3033,16.18,0.32
,,Formula 1,,,,Formula 2,,,,Formula 3,,,,G+C difference
Query genome,Reference genome,DDH,Model C.I.,Distance,Prob. DDH >= 70%,DDH,Model C.I.,Distance,Prob. DDH >= 70%,DDH,Model C.I.,Distance,Prob. DDH >= 70%,
LN785,GCF_003330865.1,31.20,[27.8 - 34.8%],0.4955,0.14,31.50,[29.1 - 34%],0.1344,0.19,30.10,[27.1 - 33.2%],0.5633,0,0.53
Table
Query genome	Reference genome	DDH	Model C.I.	Distance	Prob. DDH >= 70%	DDH	Model C.I.	Distance	Prob. DDH >= 70%	DDH	Model C.I.	Distance	Prob. DDH >= 70%
LN245	GCF_002911015.1	54.50	[51 - 58%]	0.2748	23.53	43.90	[41.4 - 46.5%]	0.0873	6.63	52.60	[49.5 - 55.7%]	0.3381	5.39	0.92
LN325	GCF_009498275.1	60.00	[56.4 - 63.6%]	0.2397	42.14	49.40	[46.8 - 52%]	0.0731	17.47	58.80	[55.6 - 61.9%]	0.2953	20.35	0.34
LN499	GCF_003330865.1	33.80	[30.4 - 37.3%]	0.4619	0.31	32.80	[30.3 - 35.3%]	0.1281	0.31	32.40	[29.5 - 35.5%]	0.5308	0.01	0.09
LN500	GCF_003330865.1	33.90	[30.6 - 37.5%]	0.4598	0.33	32.80	[30.4 - 35.3%]	0.1278	0.32	32.60	[29.6 - 35.7%]	0.5288	0.01	0.04
LN549	GCF_019399205.1	54.60	[51.1 - 58.1%]	0.2743	23.75	44.70	[42.1 - 47.2%]	0.0852	7.71	52.80	[49.7 - 55.9%]	0.3362	5.76	0.41
LN590	GCF_003330865.1	21.30	[18.1 - 25%]	0.6774	0	32.70	[30.3 - 35.2%]	0.1283	0.3	21.50	[18.7 - 24.5%]	0.7188	0	0.15
LN699	GCF_008704935.1	39.30	[35.9 - 42.8%]	0.3996	1.42	29.10	[26.7 - 31.6%]	0.1475	0.07	35.90	[33 - 39%]	0.4881	0.03	0.53
LN704	GCF_009498275.1	58.40	[54.8 - 61.9%]	0.2498	36.26	50.20	[47.5 - 52.8%]	0.0713	19.52	57.60	[54.4 - 60.7%]	0.3033	16.18	0.32
LN785	GCF_003330865.1	31.20	[27.8 - 34.8%]	0.4955	0.14	31.50	[29.1 - 34%]	0.1344	0.19	30.10	[27.1 - 33.2%]	0.5633	0	0.53
Streptomyces populi A249	GCF_002911015.1
Streptomyces fagopyri QMT-28	GCF_009498275.1
Streptomyces atratus JCM 3386	GCF_003330865.1
Streptomyces poriferorum P01-B04T	GCF_019399205.1
Streptomyces vinaceus ATCC 27476	GCF_008704935.1
Query	Subject	d0	C.I. d0	d4	C.I. d4	d6	C.I. d6	Diff. G+C
LN245	Streptomyces populi A249	54.5	[51.0 - 58.0]	43.9	[41.4 - 46.5]	52.6	[49.5 - 55.7]	0.92
LN325	Streptomyces fagopyri QMT-28	60.0	[56.4 - 63.6]	49.4	[46.8 - 52.0]	58.8	[55.6 - 61.9]	0.34
LN499	Streptomyces atratus JCM 3386	33.8	[30.4 - 37.3]	32.8	[30.3 - 35.3]	32.4	[29.5 - 35.5]	0.09
LN500	Streptomyces atratus JCM 3386	33.6	[30.2 - 37.1]	32.7	[30.3 - 35.2]	32.3	[29.3 - 35.4]	0.1
LN549	Streptomyces poriferorum P01-B04T	54.6	[51.1 - 58.1]	44.7	[42.1 - 47.2]	52.8	[49.7 - 55.9]	0.41
LN590	Streptomyces atratus JCM 3386	33.2	[29.8 - 36.7]	32.8	[30.3 - 35.3]	31.9	[29.0 - 35.0]	0.11
LN699	Streptomyces vinaceus ATCC 27476	39.3	[35.9 - 42.8]	29.1	[26.7 - 31.6]	35.9	[33.0 - 39.0]	0.53
LN704	Streptomyces fagopyri QMT-28	60.3	[56.6 - 63.8]	49.5	[46.9 - 52.1]	59.0	[55.8 - 62.2]	0.32
LN785	Streptomyces atratus JCM 3386	31.2	[27.8 - 34.8]	31.5	[29.1 - 34.0]	30.1	[27.1 - 33.2]	0.53
